# Supplementary material for: Association between Polymorphism of Genes IL-1A, NFKB1, PAR1, TP53, and UCP2 and Susceptibility to Non-Small Cell Lung Cancer in the Brazilian Amazon
Source: Genes (Basel). 2023 Feb 10;14(2):461. doi: 10.3390/genes14020461 (PMC9957054; doi:10.3390/genes14020461)
Supplement: Supplementary file 1 [file genes-14-00461-s001.zip]

Archive with 5 entries (5 files):
- Figure S1.png
- Figure S2.png
- Figure S3.png
- genes-1938117-supplementary.docx.pdf
- genes-1938117-supplementary.pdf
